# Supplementary material
Source: PubMed Central journal article supplement (PMC4910581)
Supplement: jcav07p0900s1.pdf [file jcav07p0900s1.pdf]

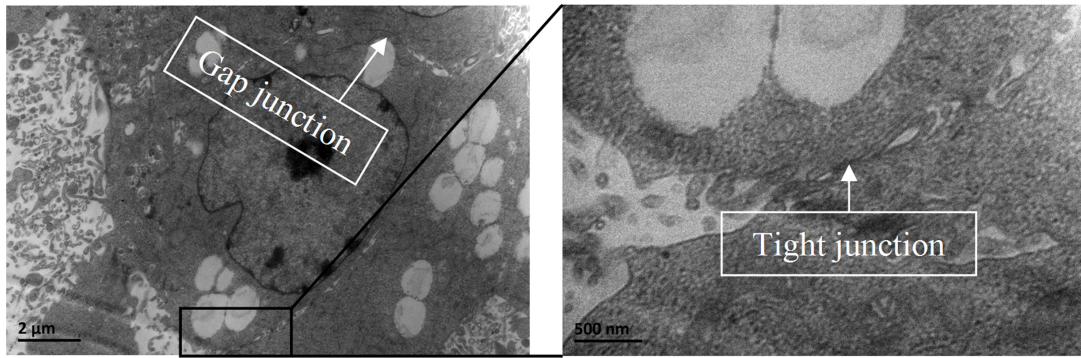

**Fig. S1.** Cell-cell junctions were found in most of cells in HCT116 3D cultures using a transmission electron microscope.
